# Supplementary material for: High HER2 intratumoral heterogeneity is a predictive factor for poor prognosis in Early-stage and Locally Advanced HER2-positive Breast Cancer
Source: Preprints.org preprint supplement (doi:10.20944/preprints202402.1136.v1), 2024-02-20
Supplement: Supplementary file 5 [file supplementary]

Archive with 4 entries (4 files):
- Fig.S1.pdf
- Fig.S2.pdf
- Fig.S3.pdf
- Fig.S4.pdf
