# Supplementary figures and images for: High HER2 intratumoral heterogeneity is a predictive factor for poor prognosis in Early-stage and Locally Advanced HER2-positive Breast Cancer
Source: Preprints.org preprint supplement (doi:10.20944/preprints202402.1136.v1), 2024-02-20

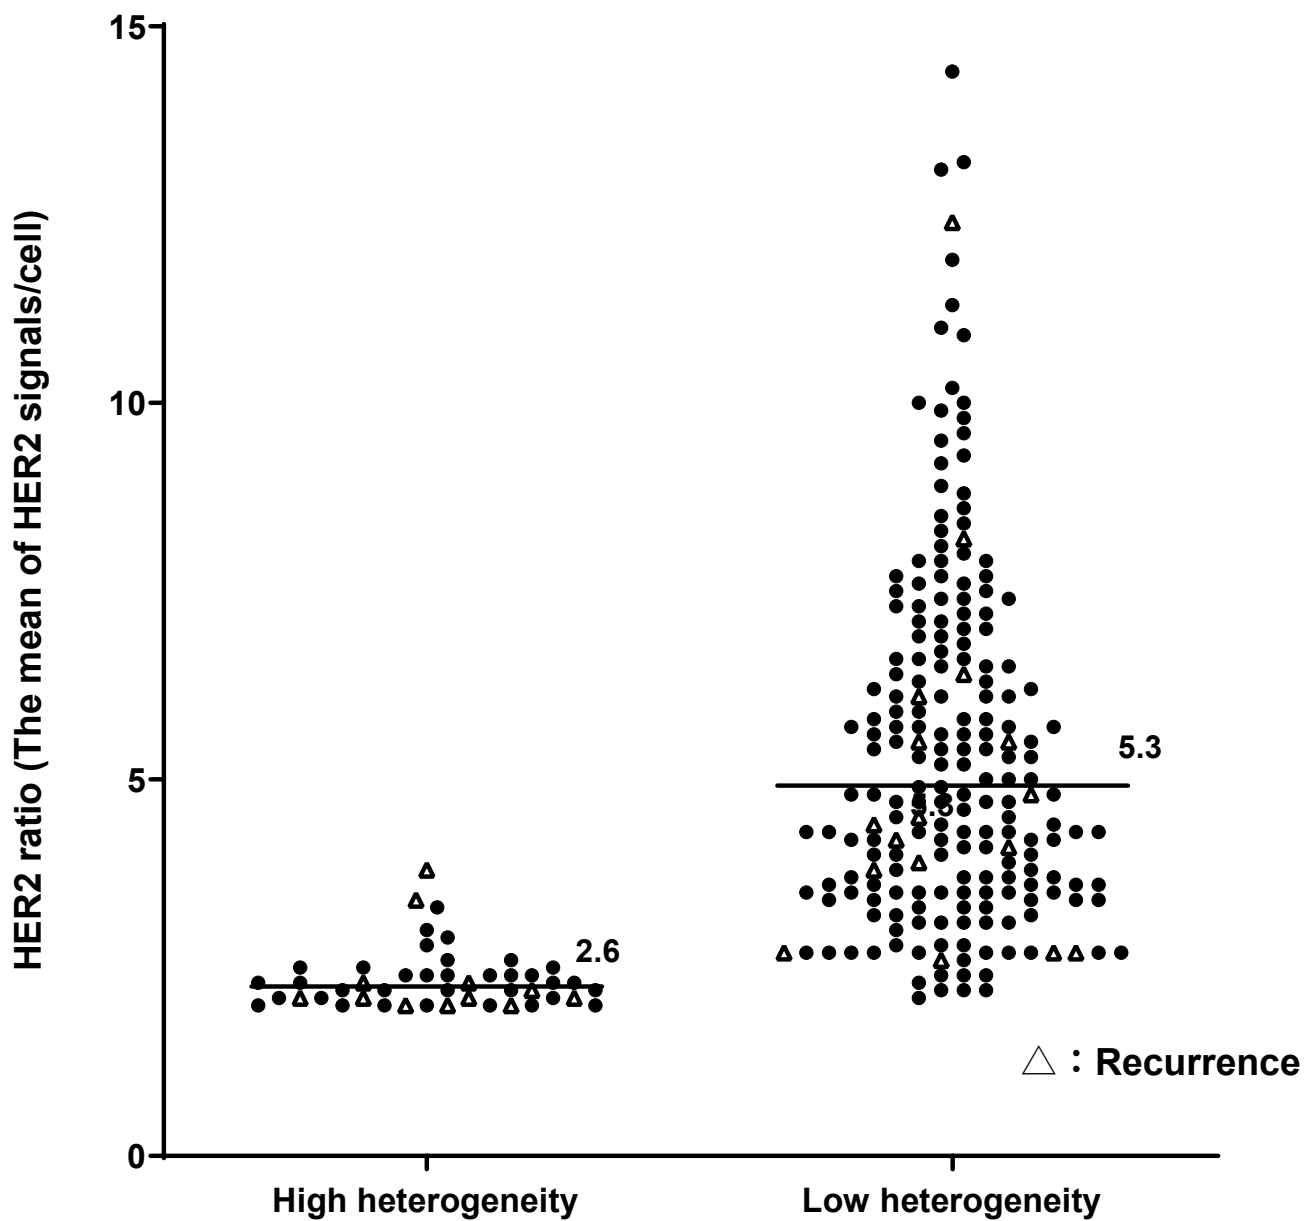

Recurrence : 28%  
(13/46)

8%  
(17/205)

Supplement: Supplementary file 1 [file supplementary]

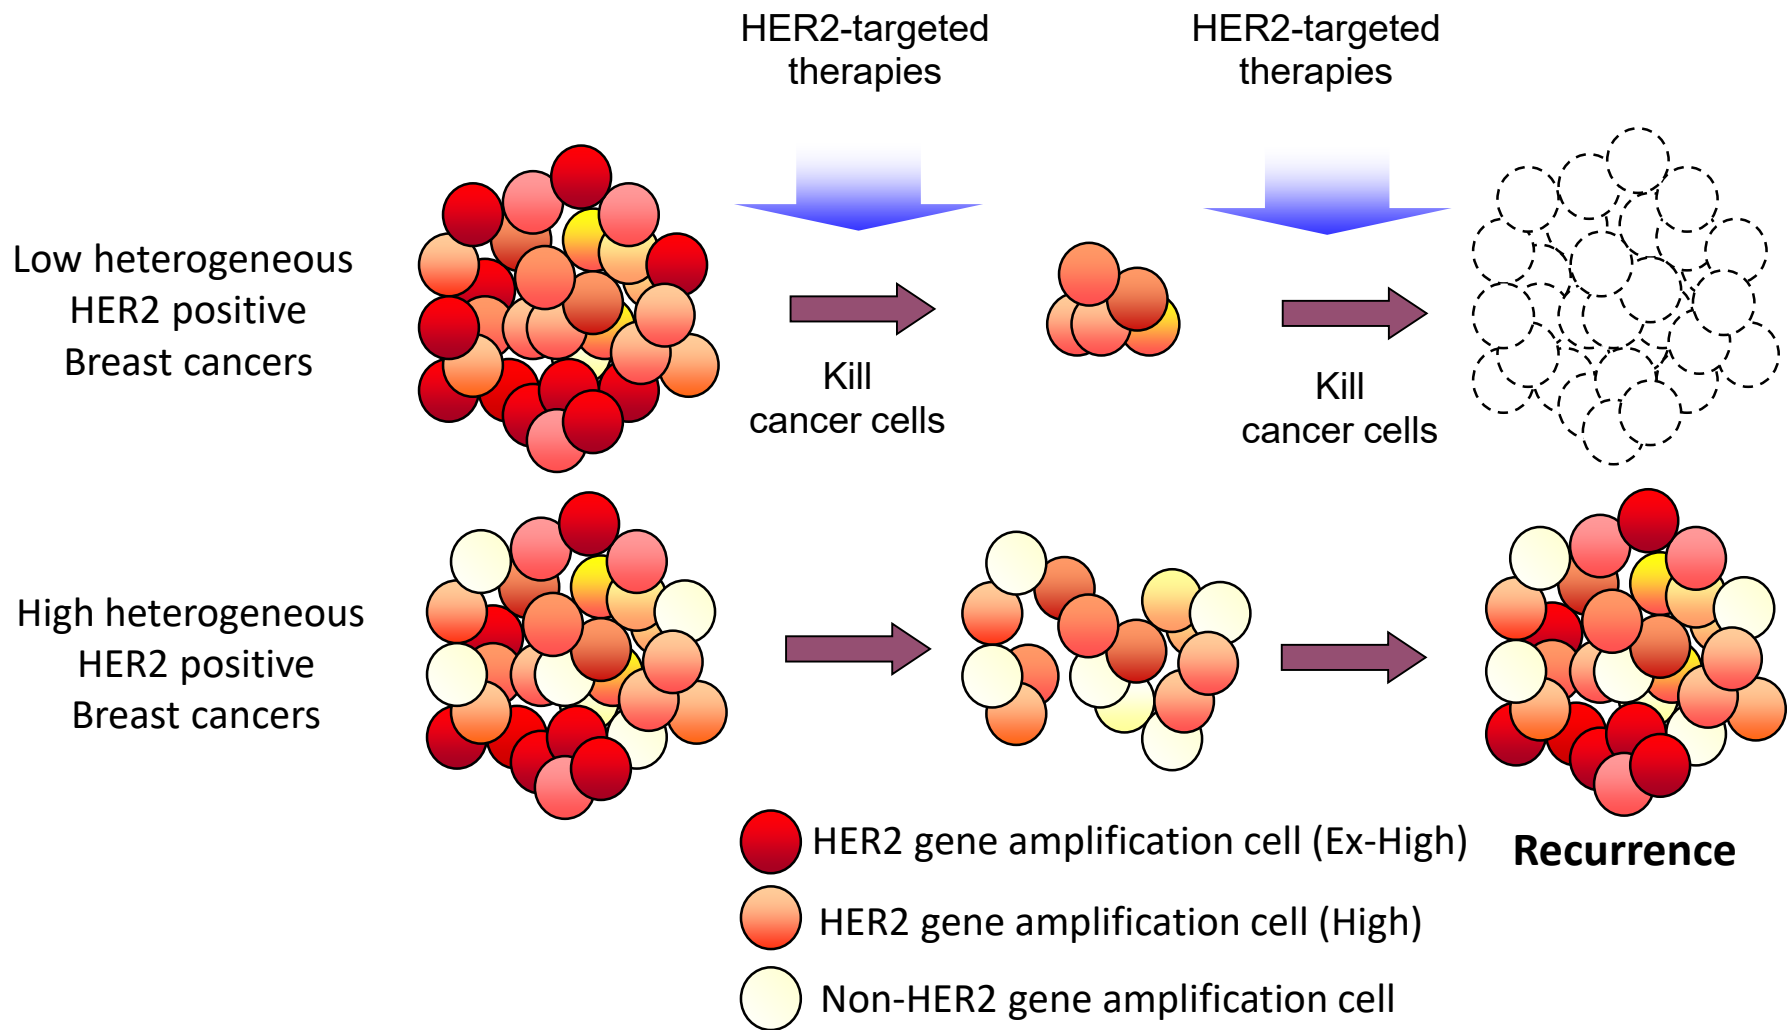

Supplement: Supplementary file 2 [file supplementary]

Population of high heterogeneous  
/ total HER2 positive  
breast cancer patients (%)

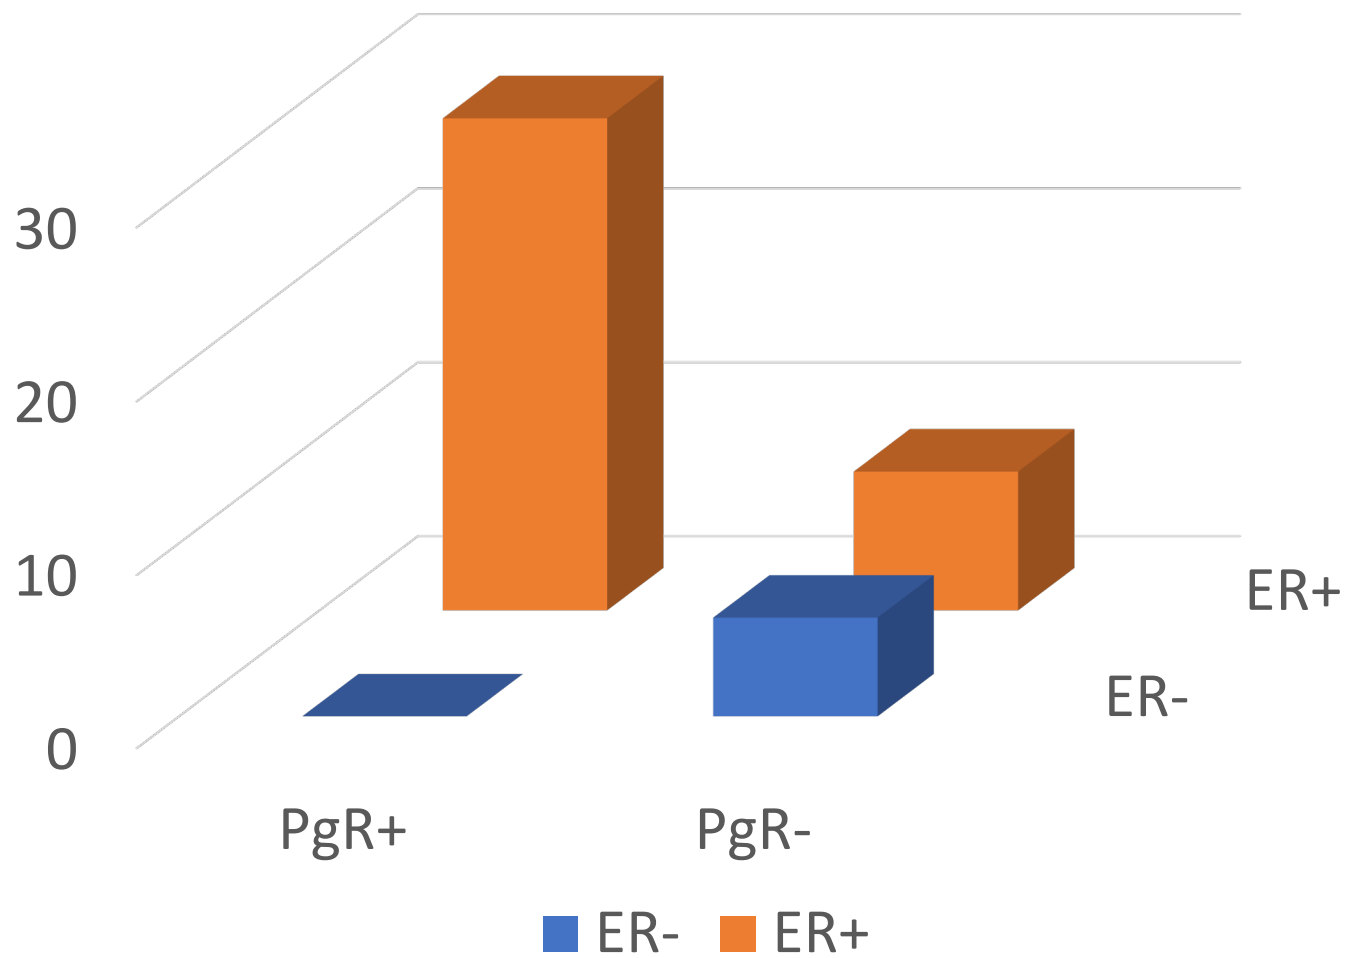

Supplement: Supplementary file 3 [file supplementary]

A (a)

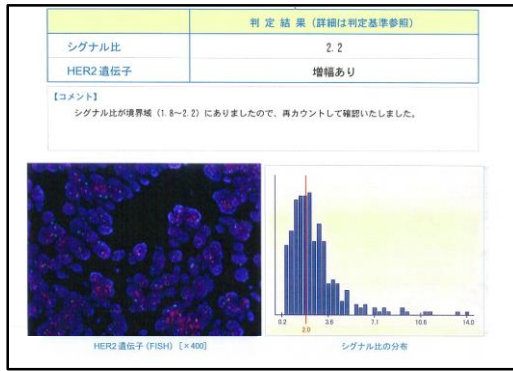

A (b)

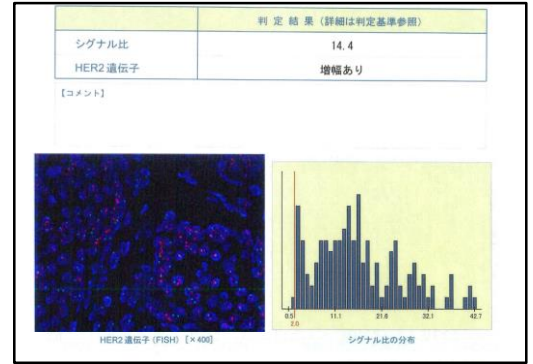

B (a)

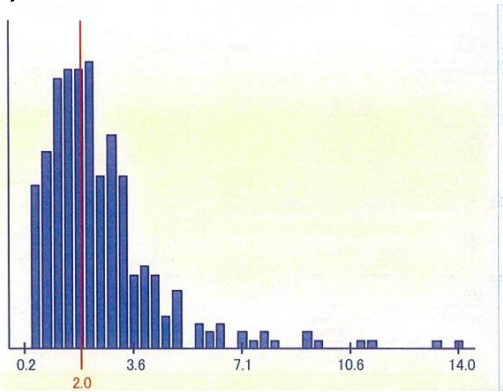

B (b)

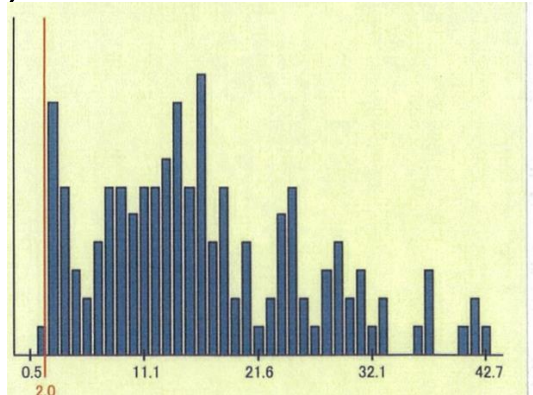

C (a)

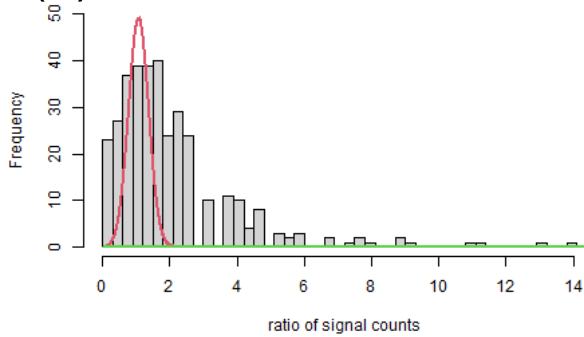

C (b)

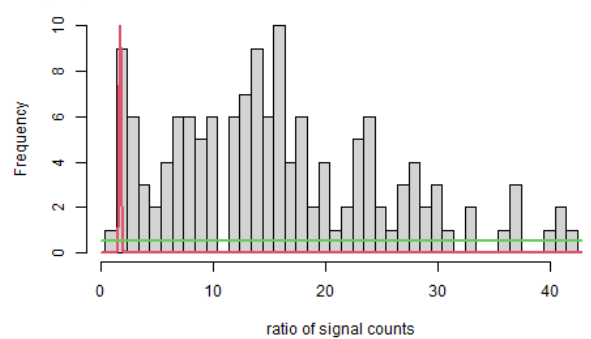

D

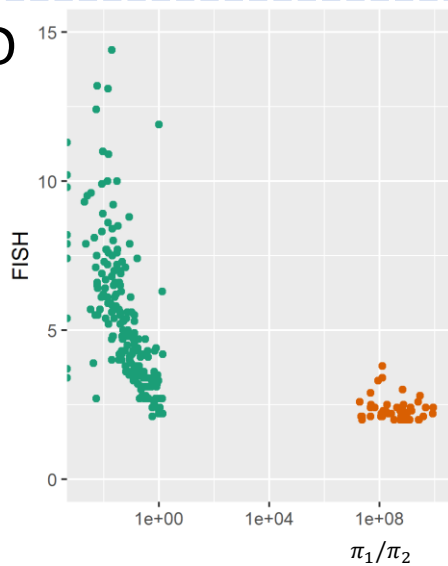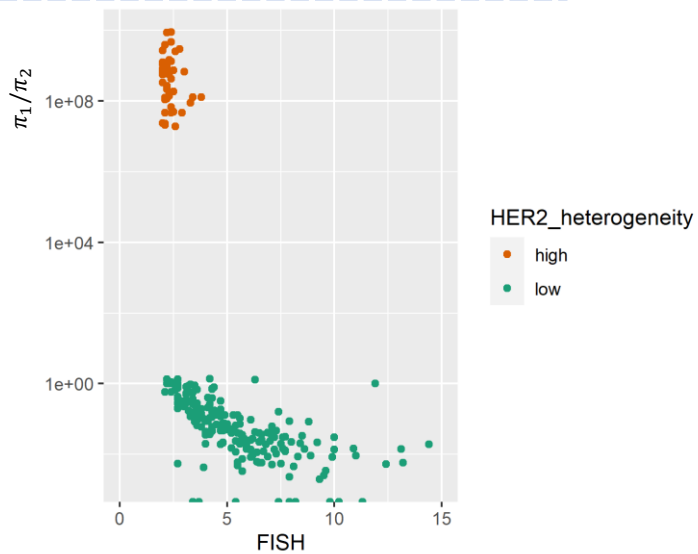

Supplement: Supplementary file 4 [file supplementary]
